# Supplementary material for: Non-retroviral Endogenous Viral Element Limits Cognate Virus Replication in Aedes aegypti Ovaries
Source: PubMed Central journal article supplement (PMC7522710; doi:10.1016/j.cub.2020.06.057), 2020-09-21
Supplement: mmc1.pdf [file mmc1.pdf]

**Current Biology, Volume 30**

**Supplemental Information**

**Non-retroviral Endogenous Viral Element Limits**

**Cognate Virus Replication in *Aedes aegypti* Ovaries**

**Yasutsugu Suzuki, Artem Baidaliuk, Pascal Miesen, Lionel Frangeul, Anna B. Crist, Sarah H. Merklng, Albin Fontaine, Sebastian Lequime, Isabelle Moltini-Conclois, Hervé Blanc, Ronald P. van Rij, Louis Lambrechts, and Maria-Carla Saleh**

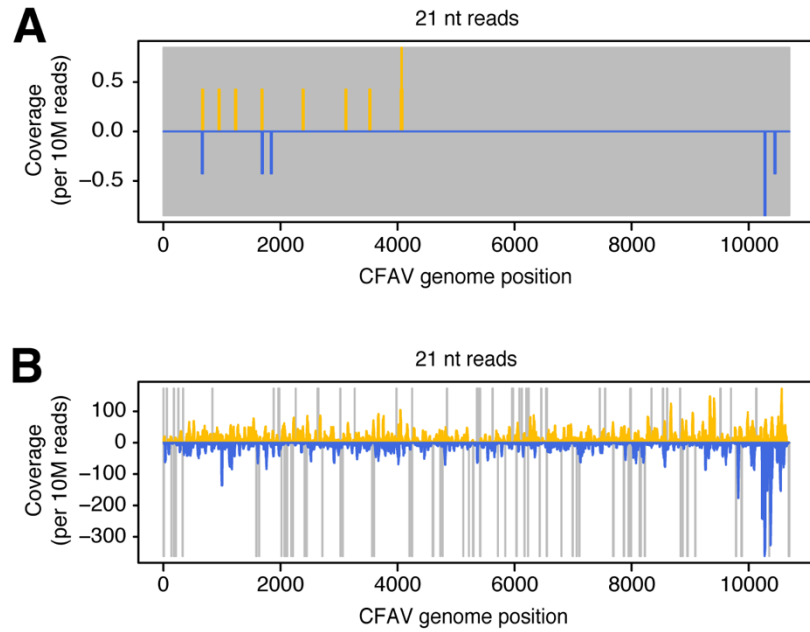

**Figure S1. siRNA response to a natural CFAV infection in *Aedes aegypti* mosquitoes harboring CFAV-EVE1 and CFAV-EVE2. Related to Figure 1.**

Profiles of siRNAs mapping to the CFAV-KPP genome from naturally CFAV-uninfected (**A**) or CFAV-infected (**B**) mosquitoes from the outbred colony. Positive- and negative-sense reads are shown in yellow and blue, respectively. Uncovered nucleotides are represented by gray lines.

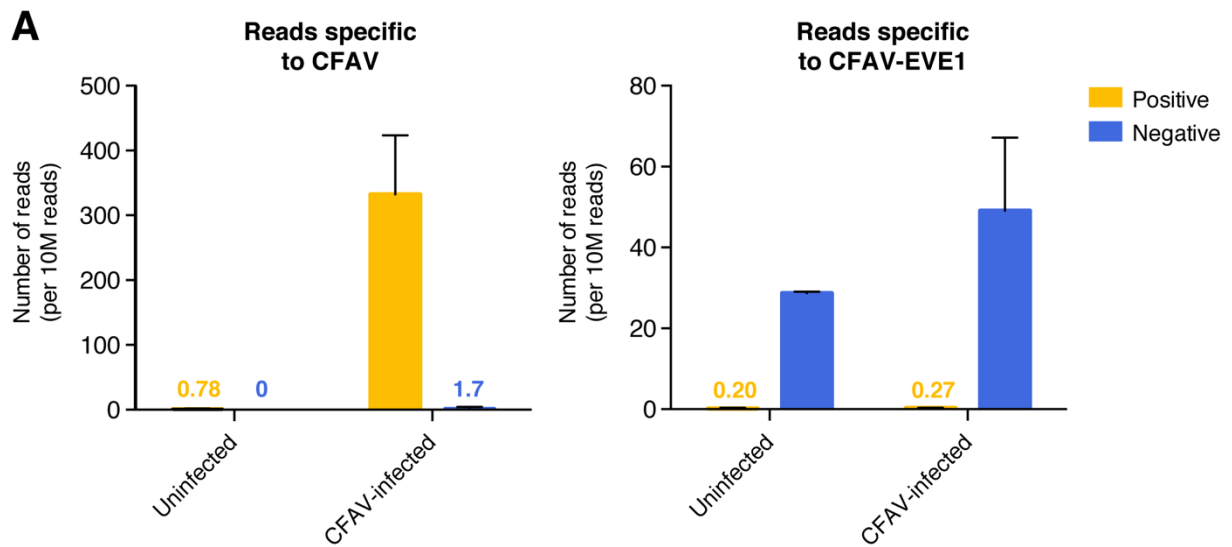

**Figure S2. Target specificity of piRNAs upon CFAV infection in the *Aedes aegypti* isofemale line harboring CFAV-EVE1. Related to Figure 2.**

Number of 26-30 nt sRNA reads unambiguously mapping to the CFAV-KPP genome (A) or to the CFAV-EVE1 locus (B) in uninfected or CFAV-infected individuals of the isofemale line. Yellow and blue colors represent positive-sense and negative-sense reads, respectively. For visual clarity, the normalized number of reads is shown above the bars when the number of reads is <1% of the maximum value.

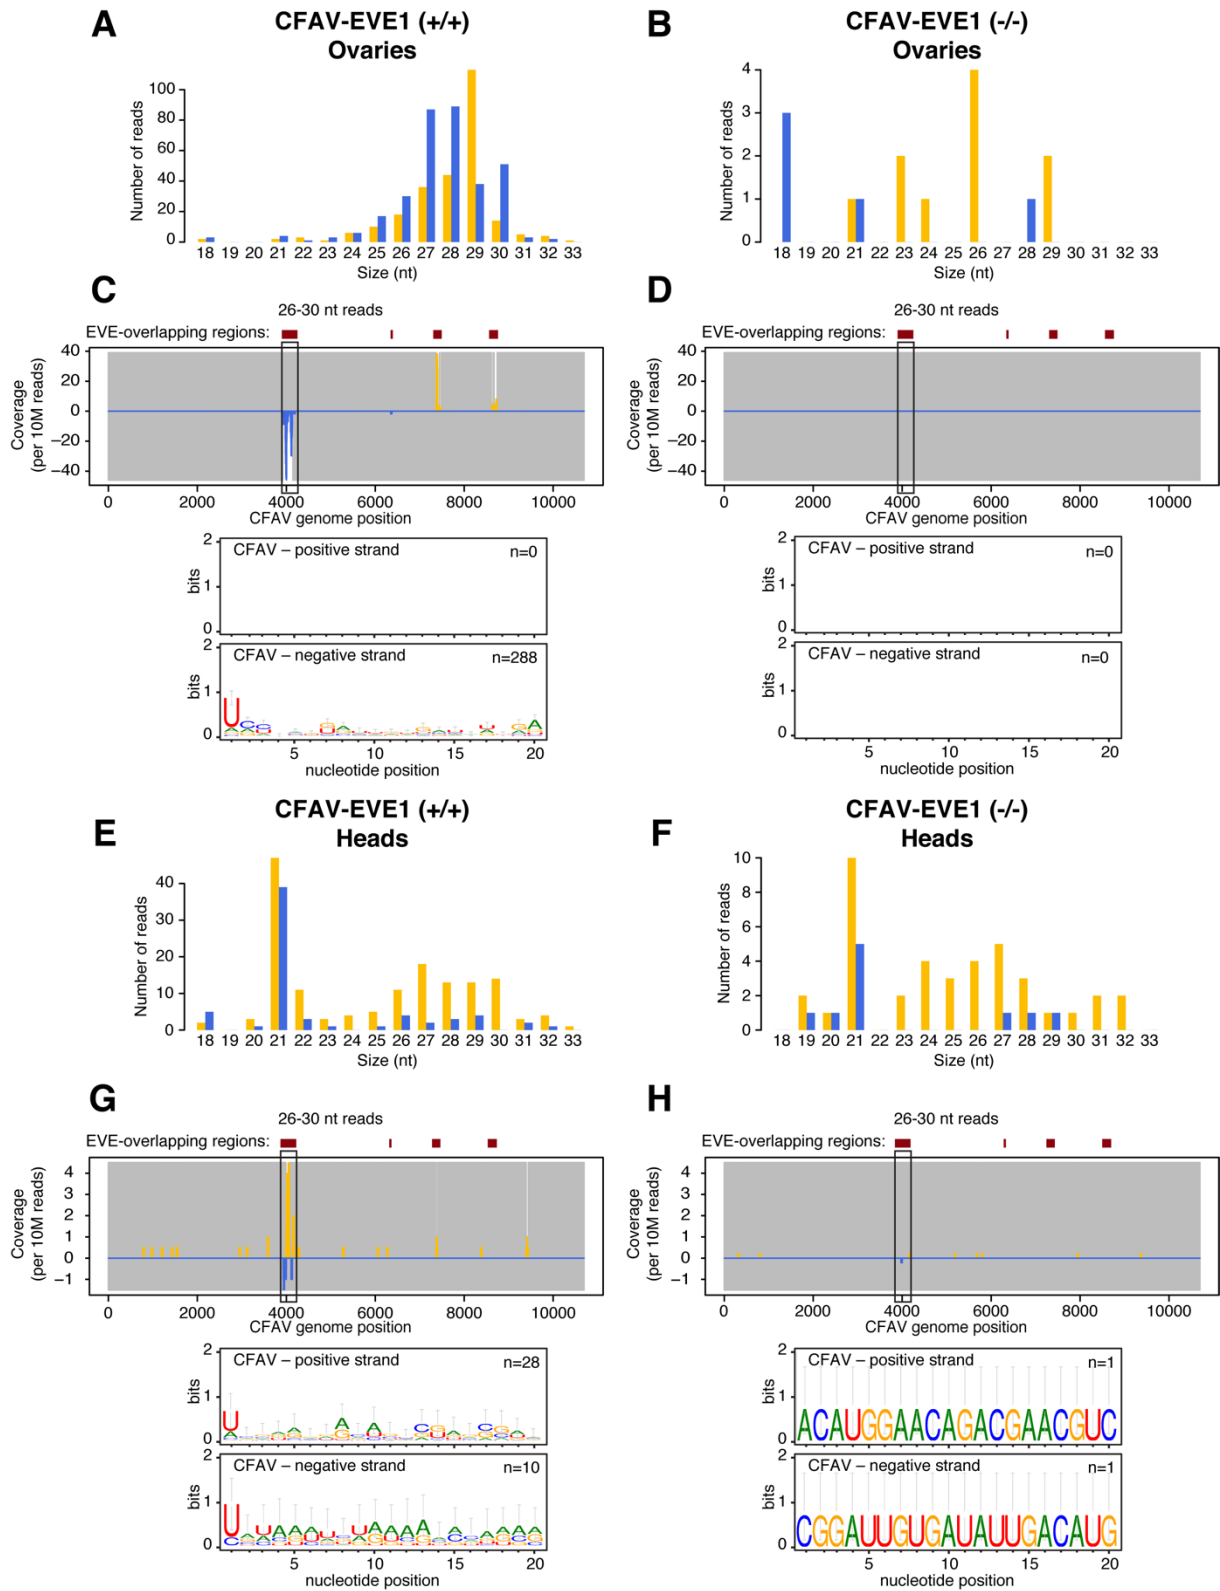

**Figure S3. Small RNA profiles of CFAV-EVE1 (+/+) and (-/-) mock-inoculated *Aedes aegypti* lines. Related to Figure 4.**

Size distribution of sRNAs mapping to the CFAV genome in ovaries (**A-B**) and heads (**E-F**) from experimentally mock-infected CFAV-EVE1 (+/+) (**A,E**) and CFAV-EVE1 (-/-) (**B,F**) mosquitoes 7 days post injection. Analysis of CFAV-derived piRNAs in ovaries (**C-D**) and heads (**G-H**) from experimentally mock-infected CFAV-EVE1 (+/+) (**C,G**) and CFAV-EVE1 (-/-) (**D,H**) mosquitoes 7 days post injection. Mapping (top) and sequence logos (bottom) of 26-30 nt sRNAs. Positive- and negative-sense reads with respect to the reference CFAV genome are shown in yellow and blue, respectively. Uncovered nucleotides are represented by gray lines.

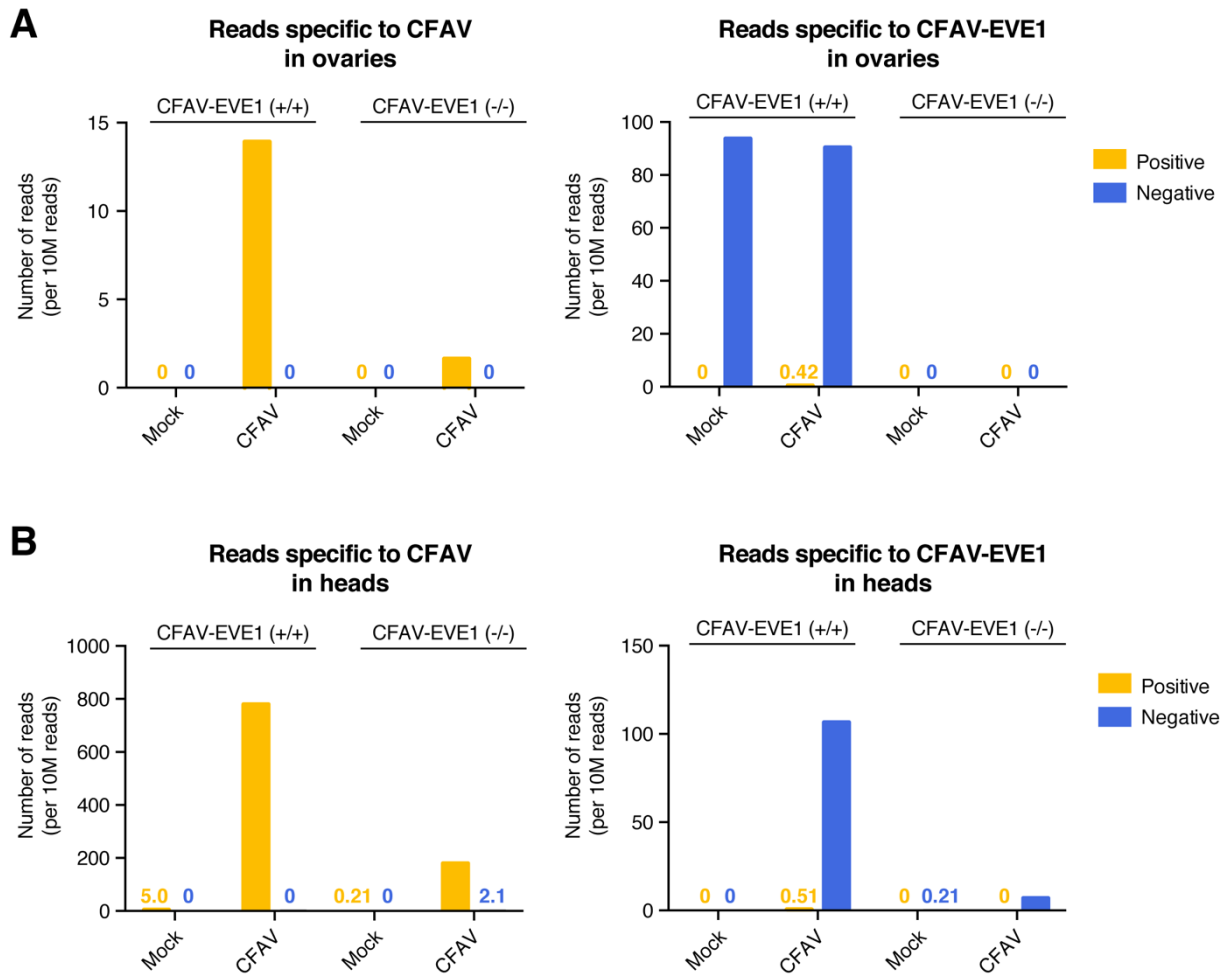

**Figure S4. Target specificity of the piRNAs upon CFAV infection in CFAV-EVE1 (+/+) and (-/-) *Aedes aegypti* lines. Related to Figure 4.**

Number of 26-30 nt sRNA reads unambiguously mapping to the CFAV-KPP genome (left) or to the CFAV-EVE1 locus (right) in ovaries (**A**) and heads (**B**) of mosquitoes from the CFAV-EVE1 (+/+) line and CFAV-EVE1 (-/-) line 7 days after mock-infection or CFAV infection. Yellow and blue colors represent positive-sense and negative-sense reads, respectively. For visual clarity, the normalized number of reads is shown above the bars when the number of reads is <1% of the maximum value.

| Name                  | Genomic region                                                                | Application                      | Direction | Primer sequence (5'→3')                                                       | Length of PCR product  | Annealing temperature |
|-----------------------|-------------------------------------------------------------------------------|----------------------------------|-----------|-------------------------------------------------------------------------------|------------------------|-----------------------|
| CFAV-NS3q-F           | CFAV NS3                                                                      | quantification                   | forward   | ACACGAGTGAAGCTGGTTGA                                                          | 92 bp                  | 56°C                  |
| CFAV-NS3q-R           | CFAV NS3                                                                      | quantification                   | reverse   | ACATACGTTCTGGTTCCCG                                                           | 92 bp                  | 56°C                  |
| RP49q-F               | <i>Aedes aegypti</i> rp49                                                     | housekeeping gene quantification | forward   | ACAAGCTTGCCCCCAACT                                                            | 97 bp                  | 60°C                  |
| RP49q-R               | <i>Aedes aegypti</i> rp49                                                     | housekeeping gene quantification | reverse   | CCGTAACCGATGTTTGCC                                                            | 97 bp                  | 60°C                  |
| S7-F                  | <i>Aedes aegypti</i> rps7                                                     | housekeeping gene detection      | forward   | GGGACAAATCGGCCAGGCTATC                                                        | 292 bp, cDNA; 406 gDNA | 64°C                  |
| S7-R                  | <i>Aedes aegypti</i> rps7                                                     | housekeeping gene detection      | reverse   | TCGTGGACGCTTCTGCTTGTTG                                                        | 292 bp, cDNA; 406 gDNA | 64°C                  |
| EVE-GT-external-F     | <i>Aedes aegypti</i> CFAV-EVE1 upstream flanking region                       | detection and genotyping         | forward   | GGTCGAAGCGAGATGAACTGTG                                                        | 1090 bp                | 70°C                  |
| EVE-GT-external-R     | <i>Aedes aegypti</i> CFAV-EVE1 downstream flanking region                     | detection and genotyping         | reverse   | GGCCAAATGCTGCTGCGAG                                                           | 1090 bp                | 70°C                  |
| EVE-GTlong-external-F | <i>Aedes aegypti</i> CFAV-EVE1 upstream flanking region                       | detection and genotyping         | forward   | CTTATGTAGTAGCTACAGGTCGAAGCGAG                                                 | 1112 bp                | 70°C                  |
| EVE-GTlong-external-R | <i>Aedes aegypti</i> CFAV-EVE1 downstream flanking region                     | detection and genotyping         | reverse   | GCAATGGCCAAATGCTGCTGCGAG                                                      | 1112 bp                | 70°C                  |
| EVE-GT-internal-F     | <i>Aedes aegypti</i> CFAV-EVE1 NS5 region                                     | detection and genotyping         | forward   | CACATCCCTGCTCCACGATC                                                          | 310 bp                 | 60°C                  |
| EVE-GT-internal-R     | <i>Aedes aegypti</i> CFAV-EVE1 NS4B-NS4A region                               | detection and genotyping         | reverse   | CCGGTCACGCAGTTCTCCATTC                                                        | 310 bp                 | 60°C                  |
| EVE2-F                | <i>Aedes aegypti</i> CFAV-EVE2 C region                                       | detection                        | forward   | CCTCATTACATGGCATTGGTG                                                         | 3417 bp                | 60°C                  |
| EVE2-R                | <i>Aedes aegypti</i> CFAV-EVE2 NS2A region                                    | detection                        | reverse   | AGGAACTGTACGCACATCAGAG                                                        | 3417 bp                | 60°C                  |
| EVE-SGup2-F           | <i>Aedes aegypti</i> CFAV-EVE1 NS5 region close to upstream flanking region   | sgRNA synthesis                  | forward   | GAAATTAATACGACTCACTATAGGATGGGATCCCAGAAGCACGTTTTAGAGCTAGAAATAGC                | 124 bp                 | 58°C                  |
| EVE-SGdwn1-F          | <i>Aedes aegypti</i> CFAV-EVE1 NS2 region close to downstream flanking region | sgRNA synthesis                  | forward   | GAAATTAATACGACTCACTATAGGAAGTATTCCTGACTTAAAAGTTTTAGAGCTAGAAATAGC               | 124 bp                 | 58°C                  |
| EVE-SGmid1-F          | <i>Aedes aegypti</i> CFAV-EVE1 middle of NS2 region                           | sgRNA synthesis                  | forward   | GAAATTAATACGACTCACTATAGGCGCTGGGGGAATCTGGGCGGGTTTTAGAGCTAGAAATAGC              | 124 bp                 | 58°C                  |
| T7-R                  | -                                                                             | sgRNA synthesis                  | forward   | AAAAGCACCGACTCGGTGCCACTTTTTCAAGTTGATAACGGACTAGCCTATTTAACTTGCTATTTCTAGCTCTAAAC | 124 bp                 | 58°C                  |

**Table S1. Primers used in this study. Related to Figure 1, 3 and 5.**

|                                                                   |                                                  |                                                                                                                                                                                                                                                                                                                                                                                                                                                                                                                                                                                                                                                                                                                                                                                                                                                                                                                                                                                                                                                                                                                                                                                                                                                                                                                                                                                                                                                                                                                                                                                                                                                                                                                                                                                                                                                                                                                                                                                                                                                                                                                                                                                                                                                                                                                                                                                                                                                                                                                                                                                                                                                                                                                                                                                                                                                                                                                                                                                                                                                                                                                                                                                                                                                                                                                                                                                                                                                                           |                                         |              |
|-------------------------------------------------------------------|--------------------------------------------------|---------------------------------------------------------------------------------------------------------------------------------------------------------------------------------------------------------------------------------------------------------------------------------------------------------------------------------------------------------------------------------------------------------------------------------------------------------------------------------------------------------------------------------------------------------------------------------------------------------------------------------------------------------------------------------------------------------------------------------------------------------------------------------------------------------------------------------------------------------------------------------------------------------------------------------------------------------------------------------------------------------------------------------------------------------------------------------------------------------------------------------------------------------------------------------------------------------------------------------------------------------------------------------------------------------------------------------------------------------------------------------------------------------------------------------------------------------------------------------------------------------------------------------------------------------------------------------------------------------------------------------------------------------------------------------------------------------------------------------------------------------------------------------------------------------------------------------------------------------------------------------------------------------------------------------------------------------------------------------------------------------------------------------------------------------------------------------------------------------------------------------------------------------------------------------------------------------------------------------------------------------------------------------------------------------------------------------------------------------------------------------------------------------------------------------------------------------------------------------------------------------------------------------------------------------------------------------------------------------------------------------------------------------------------------------------------------------------------------------------------------------------------------------------------------------------------------------------------------------------------------------------------------------------------------------------------------------------------------------------------------------------------------------------------------------------------------------------------------------------------------------------------------------------------------------------------------------------------------------------------------------------------------------------------------------------------------------------------------------------------------------------------------------------------------------------------------------------------------|-----------------------------------------|--------------|
| Source                                                            |                                                  |                                                                                                                                                                                                                                                                                                                                                                                                                                                                                                                                                                                                                                                                                                                                                                                                                                                                                                                                                                                                                                                                                                                                                                                                                                                                                                                                                                                                                                                                                                                                                                                                                                                                                                                                                                                                                                                                                                                                                                                                                                                                                                                                                                                                                                                                                                                                                                                                                                                                                                                                                                                                                                                                                                                                                                                                                                                                                                                                                                                                                                                                                                                                                                                                                                                                                                                                                                                                                                                                           |                                         |              |
| published WGS data (SRR5562867)                                   | CFAV-EVE1                                        | CTCGCCATGGCAGATCCCTGCTCCACGATCCTATAGCCGATCATTTCGAACGTTGGCGATGAATTCTTCTTTTGATAAAATACGCGGTGTAAGTTGCGATTCTTAAGAACCAGGATAAAATGCTTATGATGCTGCTGTTGACTTTCCAGAGCTCGAAACTGGTTGAAGGGGGCTACCGCGCCCAAGGCTCTAGCGCAATGTGCATGAACCTATAAAAAAGGTAGTTCTATTCTAGCAACCCATGGCAGACACCATGGAGCCAAAATCCATGACATCATGGATCTTTGACCGGGAATGGAGAAGTGCCTGACCGGTCTACAAGTGCAGCGCTCCCTACCCTGCTAATGGCCCTGCTCTCGCTACCGTTGTTTCTGATCTTCAGTTTGAACGCTATGTACAAGTACGCATGTCAATATACAATCCGAGGAACCGGTACAGAGACTCTGGCGCAATTTATGTTTTGGACTGTATCTTTGGCGAGCGCTGGGGAATCTGGCGCGGAGAAAGCTCACCAACCAACGGTGGCAGCTGTCTAGCCTTTACAATGATAGTGTCTTTCTTTACATGGAACAAACGAGCGTTAGTATGGAGCTTGAATTCATCTCAGCTGAGAGACTCCCGAAGGAGTGTCAACCGAATATGATGACGGGATAAGTATTCTGACTTAAAGTGGCGACGAGTAAAAACAGTGTAAACCGTGCAAAAAGTTATGTGAAAACTAAGTGAATTTGTCTTTTGTATCTTCTGTGGAGTTAATCACCGTTAATTTCAATCTACTCGCAGCAGCATTGGCCATTGCA                                                                                                                                                                                                                                                                                                                                                                                                                                                                                                                                                                                                                                                                                                                                                                                                                                                                                                                                                                                                                                                                                                                                                                                                                                                                                                                                                                                                                                                                                                                                                                                                                                                                                                                                                                                                                                                                                                                                                                                                                                                                                                                                                                                                                                                                                                                                                                                                                                                                                                                                                                                                                                          |                                         |              |
| AaegL3 assembly                                                   | CFAV-EVE1 + flanking regions sequence            | AACTACCAGAAACGGTTGTAATCGACAACGAAAAATCATTTTTATCCGGCGAAGTGTAACTTTTTCAATGAAAAAAAATAACTCCTTATGTAGTAGCTACAGGTGCAAGCGAGATGAACGTGTGATATATGTCACAATCTGAATATATTATACATGTAGTAGTATAAGCAGAGAATAAAAAAACACAGCGAGCTGGGCTGCCCTCTTTTATCGTCGACTTTCGACCAAACAACACCTATTTGTTGTACTTCAATCCGAGAACTAATAGCAGTAAACCTAAAAAGAACAATCAGTATAGAACAATAAAAGTGGCGACGAGGATGGATCCCAGAAGCACTGGTCTGAATGGCTTCTGCACATCTCGCCATGGCAGATCCCTGCTCCACGATCCTATAGCCGATCATTTCGAACGTTGGCGATGAATTTCTTTTGATAAAATACGCGGTGTAAGTTGCGATTCTTAAGAACCAGGATAAAATGCTTCATGATCGTCTGTTGACTTTCCAGAGCTCGAAACTGGTTGAAGGGGGCTACCGCGCCCAAGGCTCTAGCGGCAATGTGCATGAACCTATAAAAAAGGTAGTTTATTCTAGCAACCCATGGCAGACACCATGGAGCCAAAATCCATGACATCATGGATCTTTGACCGGGAATGGAGAAGTGCCTGACCGGTCTACAAGTGCAGCGCTCCCTACCCTGCTAATGGCCCTGCTCTCGCTACCGTTGTGTTTCTGATCTTCAGTTTGAACGCTATGTACAAGTACGCATGTCAATATCACATCCGAGGAACGGTACAGAGACTCTGGCGCAATTTATGTTTTGGACTGTATCTTTGGCGAGCGCTGGGGAATCTGGCGCGGAGAAAGCTCACCAACCAACGGTGGCAGCTGTCTAGCCTTTACAATGATAGTGTCTTTCTTTACATGGAACAAACGAGCGTTAGTATGGAGCTTGAATTCATCTCAGCTGGAGACTCCCGAAGGAGTGTCAACCGAATATGATGACGGGATAAGTATTCTGACTTAAAGTGGCGACGAGTAAAAACAGTGTAAACCGTGCAAAAAGTTATGTGAAAACTAAGTGAATTTGTCTTTTGTATCTTCTGTGGAGTTAATCACCGTTAATTTCAATCTACTCGCAGCAGCATTGGCCATTGCA                                                                                                                                                                                                                                                                                                                                                                                                                                                                                                                                                                                                                                                                                                                                                                                                                                                                                                                                                                                                                                                                                                                                                                                                                                                                                                                                                                                                                                                                                                                                                                                                                                                                                                                                                                                                                                                                                                                                                                                                                                                                                                                                                                                                                                                                    |                                         |              |
| Thai <i>Aedes aegypti</i> isofemale line                          | CFAV-EVE1 + flanking regions sequence            | AACTACCAGAAACGGTTGTAATGGACAACGAAAAATCATTTTTATCCGGTGAAGTGTAACTTTTTCAATGAAAAAAAATAACTCCTTATGTAGTAGCTACAGGTGCAAGCGAGATGAACGTGTGATATATGTCACAATCAGATTATATTATACATGTAGTAGTATAAGCAGAGAATAAAAAAACACAGCGAGCTGGGCTGCCCTCTTTTATCGTCGACTATCGACCAAACAACACCTATCTTTGTTGACTTCAATCCGAGAACTAATAGCAGTAAACCTAAAAAGAACAATCAGTATAGAACAATAAAAGTGGCGACGAGGATGGATCCCAGAAGCACTGGTCTGAATGGCTTCTGCACATCTCGCCATGGCAGATCCCTGCTCCACGATCCTATAGCCGATCATTTCGAACGTTGGCGATGAATTTCTTTTGATAAAATACGCGGTGTAAGTTGCGATTCTTAAGAACCAGGATAAAATGCTTCATGATCGTCTGTTGACTTTCCAGAGCTCGAAACTGGTTGAAGGGGGCTACCGCGCCCAAGGCTCTAGCGGCAATGTGCATGAACCTATAAAAAAGGTAGTTTATTCTAGCAACCCATGGCAGACACCATGGAGCCAAAATCCATGACATCATGGATCTTTGACCGGGAATGGAGAAGTGCCTGACCGGTCTACAAGTGCAGCGCTCCCTACCCTGCTAATGGCCCTGCTCTCGCTACCGTTGTGTTTCTGATCTTCAGTTTGAACGCTATGTACAAGTACGCATGTCAATATCACATCCGAGGAACGGTACAGAGACTCTGGCGCAATTTATGTTTTGGACTGTATCTTTGGCGAGCGCTGGGGAATCTGGCGCGGAGAAAGCTCACCAACCAACGGTGGCAGCTGTCTAGCCTTTACAATGATAGTGTCTTTCTTTACATGGAACAAACGAGCGTTAGTATGGAGCTTGAATTCATCTCAGCTGGAGACTCCCGAAGGAGTGTCAACCGAATATGATGACGGGATAAGTATTCTGACTTAAAGTGGCGACGAGTAAAAACAGTGTAAACCGTGCAAAAAGTTATGTGAAAACTAAGTGAATTTGTCTTTTGTATCTTCTGTGGAGTTAATCACCGTTAATTTCAATCTACTCGCAGCAGCATTGGCCATTGCA                                                                                                                                                                                                                                                                                                                                                                                                                                                                                                                                                                                                                                                                                                                                                                                                                                                                                                                                                                                                                                                                                                                                                                                                                                                                                                                                                                                                                                                                                                                                                                                                                                                                                                                                                                                                                                                                                                                                                                                                                                                                                                                                                                                                                                                                   |                                         |              |
|                                                                   | CFAV-EVE1 + flanking regions sequence annotation | Positions on CFAV-EVE1 + flanking regions sequence                                                                                                                                                                                                                                                                                                                                                                                                                                                                                                                                                                                                                                                                                                                                                                                                                                                                                                                                                                                                                                                                                                                                                                                                                                                                                                                                                                                                                                                                                                                                                                                                                                                                                                                                                                                                                                                                                                                                                                                                                                                                                                                                                                                                                                                                                                                                                                                                                                                                                                                                                                                                                                                                                                                                                                                                                                                                                                                                                                                                                                                                                                                                                                                                                                                                                                                                                                                                                        | Positions on CFAV-KPP genome (LR596014) | Identity (%) |
|                                                                   | Upstream flanking                                | 1-329                                                                                                                                                                                                                                                                                                                                                                                                                                                                                                                                                                                                                                                                                                                                                                                                                                                                                                                                                                                                                                                                                                                                                                                                                                                                                                                                                                                                                                                                                                                                                                                                                                                                                                                                                                                                                                                                                                                                                                                                                                                                                                                                                                                                                                                                                                                                                                                                                                                                                                                                                                                                                                                                                                                                                                                                                                                                                                                                                                                                                                                                                                                                                                                                                                                                                                                                                                                                                                                                     | -                                       | -            |
|                                                                   | NS5                                              | 515-330                                                                                                                                                                                                                                                                                                                                                                                                                                                                                                                                                                                                                                                                                                                                                                                                                                                                                                                                                                                                                                                                                                                                                                                                                                                                                                                                                                                                                                                                                                                                                                                                                                                                                                                                                                                                                                                                                                                                                                                                                                                                                                                                                                                                                                                                                                                                                                                                                                                                                                                                                                                                                                                                                                                                                                                                                                                                                                                                                                                                                                                                                                                                                                                                                                                                                                                                                                                                                                                                   | 8563-8748                               | 94.6         |
|                                                                   | NS4B                                             | 681-512                                                                                                                                                                                                                                                                                                                                                                                                                                                                                                                                                                                                                                                                                                                                                                                                                                                                                                                                                                                                                                                                                                                                                                                                                                                                                                                                                                                                                                                                                                                                                                                                                                                                                                                                                                                                                                                                                                                                                                                                                                                                                                                                                                                                                                                                                                                                                                                                                                                                                                                                                                                                                                                                                                                                                                                                                                                                                                                                                                                                                                                                                                                                                                                                                                                                                                                                                                                                                                                                   | 7322-7491                               | 98.8         |
|                                                                   | NS4A                                             | 672-729                                                                                                                                                                                                                                                                                                                                                                                                                                                                                                                                                                                                                                                                                                                                                                                                                                                                                                                                                                                                                                                                                                                                                                                                                                                                                                                                                                                                                                                                                                                                                                                                                                                                                                                                                                                                                                                                                                                                                                                                                                                                                                                                                                                                                                                                                                                                                                                                                                                                                                                                                                                                                                                                                                                                                                                                                                                                                                                                                                                                                                                                                                                                                                                                                                                                                                                                                                                                                                                                   | 6324-6381                               | 94.8         |
|                                                                   | NS2                                              | 726-1060                                                                                                                                                                                                                                                                                                                                                                                                                                                                                                                                                                                                                                                                                                                                                                                                                                                                                                                                                                                                                                                                                                                                                                                                                                                                                                                                                                                                                                                                                                                                                                                                                                                                                                                                                                                                                                                                                                                                                                                                                                                                                                                                                                                                                                                                                                                                                                                                                                                                                                                                                                                                                                                                                                                                                                                                                                                                                                                                                                                                                                                                                                                                                                                                                                                                                                                                                                                                                                                                  | 3924-4258                               | 96.4         |
|                                                                   | Downstream flanking                              | 1061-1200                                                                                                                                                                                                                                                                                                                                                                                                                                                                                                                                                                                                                                                                                                                                                                                                                                                                                                                                                                                                                                                                                                                                                                                                                                                                                                                                                                                                                                                                                                                                                                                                                                                                                                                                                                                                                                                                                                                                                                                                                                                                                                                                                                                                                                                                                                                                                                                                                                                                                                                                                                                                                                                                                                                                                                                                                                                                                                                                                                                                                                                                                                                                                                                                                                                                                                                                                                                                                                                                 | -                                       | -            |
| published RNA-seq data (SAMN04480331, SAMN04480332, SAMN04480333) | CFAV-EVE2 sequence                               | GATAAAATTTTACTCTAAGCACCCGATCCAAATCGGGATGTCGGAATGCTTGTGTTTGTAGTTCTTACAGGAGGACATCGTCCAAGCCCTATTACATGGCATTGGTGCTTATGCCCCTGTTGCCTCCATCGACCGGCGAATTCGCTCATTATCTCGACGTGTACCGCTCTTGAATCTCGACGAACCCAGGAATCCTATGACGCTAGCTTTTCTTGGCTTTCTCACAGTGTATGTGGATGCGTGGTATTGACATGCAAGTTTCAACCGCTAAGGGTACGGAAATTTTGTGAAAGACGAACCCGACAGACTACTTGCATCTGTTCAAGTTACCCGCTGATGGTTGCTGGAGTGGCACTTTGTCAAAAAGTGAAGTACTGTTGGCAAAGGACCTCGAGTCGACAGATTGCGGATCAACGTGGACTGAGTTACATTTGCGGTATCGGAGATGCGTGTGAAAGACGTGAAAAGCGATCACGTGAACCCCGAAAAGCGGATCTGCTAGCTGAAATGGAGATCATCGCGTTCAAGACCATTCGCGAAAATAAGACAATTTTTCATCGTGGCCCTATTGTGTGGCAATCGCGAAGCGTTGGCCACCTGGGTCGTGATTTCTGCGCAATGGCACTTGGACCAAGTAAGGGGGAGTTGTTGAACCGTTATACACGCTGAAAGCGAAGACAGATGACCATGCTACAGACCATCGTGAAGCGGAGGAAAGGGTACGTCGTGGCCACGCCAAACGGTCTTCTCGAGTTTAAACAAGCCGCGGAGATCTATGGGGGCAATGGTGCAGGATTACTCGCAGATTGCCAGTCAACGCTATTCGACTGACGTGTGTCGGTGGATGCGAGCTCAACATGGCTGACATCATGGCCAAGGACGAGTATGCTCGACCAACCATACAACCGGTTGGGGCACTGGGTGCTTCAAGTGGGGATTGGATTGTTGGAACGTGCGTGAACCTCATTGCGACAGAGGATTAACGTTTCTTATCGCTAGGTCAGCCATTGTCATGAACGTTACCGTAGCTTCCACTCCGTTAGCGACACACAACAGATGGTTGGCGACATACCGCTCACATTTAGGTTTGGCAAACTCGGAAACCGCGGATGACTGCGAGTTGGAGTCTGAGCAGTTGCTGCTTACTATACGTTACGGGAAGCTCTCAGAGGGGCTGTTTTACGGTCTCAAGTTGATAGTTGGCTGGAGTGCCTACCGTTAGTGGTGGCAGCGGATGGAGAAAGTTGTTGTGGGGAGATGCTAGGTTCAATGAGATTCTAGTAAAAACGTAATGAACCTTCGTTGCTCGGAAGCAGCGATCGCCACCCATGATGGATTCCGTGACATCTCTTTGTTTGTGAGATTAGTCTGACAAAAGTCAAGTTCAGTGGTGTCTTTTCGAGACTGTCCAGGCCAAAACATCCACATTTACCCAAAGACGGCTTCGGGTATAGTGGAGTGGTAATAACTACCCTCACCGCTTCTTCAACGAGACCTGTTCCGCTTAGCTTACCGCTTCTGCTGCAATCCACAATAATGATCTTCTCAGGGAAGACACTTCTCGGCAATTTGTCAAGTGCGGAAACCATACAAGTACCTTGTCTGTTGGGAGCACTTCAAGTTTCTATTGAGTGTGCCCTAACCCATCTCGCAAGGATGGCGCTGGCTCGGCAGCTGGTGGATCGGTATCGAGGTTTGGCGTGTGCGAGGAGTGGCAGGATTTGGTTGGAAAGTTTTGCGTTGGTGCTTCTTCCAAACACAACCTTCTGGTCAATTTGCTGCTCGCTGCCCTGATTGACAAACGCATAGCCTTTCTATTTGTTTTAGGGGGTATTTTACTATGTGCGGGGCTGATCTGGGGTGGAAATGACACCAGAGAAAAACCATCTCGTGGCGAGCGGCGCTTTTGTGTGAAACACTTGGCGTGGCAATTTCCAATGACCATGCTGTGGAACCTGAAGATTACTCGTTCACTGACTTGTACATAAAGGATATGTTCAAGTGGACCAAGCAACCTGCTTGAATTTGTGAGGACGCTTTCAGTGGCTAGCCCTGCGCAGAGCTGCTTCTCTGCTGTTGGTCTGATGGTCTGAACAGGTATGTAATGACACATTGGCAGTACATTTCAAGTTCTCCGAAACATCAAAGAGAACCATTCCGTCACCAATTAACCTAATTCAGTACAAGTTCTCATCTTATGTTGCACATGGACGCGTGGAGGATTTGGGGCATCTACCAACAATGTTTGAAGCTATCCGAAAGAGGGTATAAGGTCATCCGATTGTCGATCGCGCCCGATAATCGCCGACTTTGTGAAAGCTGTCTCTTCCAATTTCAAGTTTACGGGCTCCGGCGAGGCTGTATGGTTCAAACGTTCAAGTTTGGGTTGAGGTTCTCAAAGAACTCATCGACCGAGTGTCCACGTTACCTGGCGGGCGTGTGCGTAAGAATGGTCGAACTGTCACTGACGGCATGTTTTGGATGGAAGCACAGTGTGGATGGAGTTGCTCAGATCACATCACTCGAGATGCGTCAATCACACCGCTGTGTGGGCCAGGAAATACACCCCGGACACGCTCAGTGAACCTTTCAGACCAAGCTTTATTTATTTCCACTGCTTGGGGGGACCAATTTCCGAGTGAAACCATATAATCGGGTACAAGACACAACTGACTTCCGTTGAACGTTAGTGACATCACTCTCATAGAGGGCCAGCTCCTGGCACAAAGTCAAGTGGACTCTAGATGTGATGGCGAATGCACGCACAGGTGATTGGACCAATGACACGGAATCTGGTGTGGCAGTATGCAACAAGATAGTCCACTTTCGAGTCCGTTGACCTCTATATTATCCCATGGAGATCCAACCTTGAACCATGTCTGAAGCGTCAGAGTCAAAATTTTGAAGAAACCGATCGGGAGGAAACCAAGTTCAGACATATTAAGAGATACGGGAAGGCGAACCGCGCAATCCGATTTCCGGAGGGTGGAGTCACTGACGAGTGGGTTGATCGCTCCCTCAAATCTCGTGCCTGCTTCTCATTGCAAGTTATCGGGCAAAAACCAAGACATCGACACTAAGTGTCTTTTGTGACGATTCTAGCAATGGCGCTTTGGACTCCCAATTTGTTTTCATCTGTGGGGCTATCTGCTTGGGTTGTGATGAGTGGCGTCTCATCTCGCAACCCGAAAGATCTATTGATGAATCTATGGATCATACTACAGACTGGGAGCTCAGCAGTCTGCTGTTGGGTACATGATCAGGAAGAACTCTCAATAGTCTAGGGTCCACCACCTGGTACTGTATGTCGTACAGTTCTGTTCCGCGCTCGAGCCAC |                                         |              |
|                                                                   | CFAV-EVE2 sequence annotation                    | Positions on CFAV-EVE2 sequence                                                                                                                                                                                                                                                                                                                                                                                                                                                                                                                                                                                                                                                                                                                                                                                                                                                                                                                                                                                                                                                                                                                                                                                                                                                                                                                                                                                                                                                                                                                                                                                                                                                                                                                                                                                                                                                                                                                                                                                                                                                                                                                                                                                                                                                                                                                                                                                                                                                                                                                                                                                                                                                                                                                                                                                                                                                                                                                                                                                                                                                                                                                                                                                                                                                                                                                                                                                                                                           | Positions on CFAV-KPP genome (LR596014) | Identity (%) |
|                                                                   | C-NS2A                                           | 56-3516                                                                                                                                                                                                                                                                                                                                                                                                                                                                                                                                                                                                                                                                                                                                                                                                                                                                                                                                                                                                                                                                                                                                                                                                                                                                                                                                                                                                                                                                                                                                                                                                                                                                                                                                                                                                                                                                                                                                                                                                                                                                                                                                                                                                                                                                                                                                                                                                                                                                                                                                                                                                                                                                                                                                                                                                                                                                                                                                                                                                                                                                                                                                                                                                                                                                                                                                                                                                                                                                   | 331-3791                                | 96.1         |

Table S2. CFAV-EVE1 and CFAV-EVE2 sequence annotation based on similarity to the CFAV-KPP genome. Related to Figure 1.



|                                                              |                                                                                                                                                                                                                                                                                                                                                                                                                                                                                      |                              |         |
|--------------------------------------------------------------|--------------------------------------------------------------------------------------------------------------------------------------------------------------------------------------------------------------------------------------------------------------------------------------------------------------------------------------------------------------------------------------------------------------------------------------------------------------------------------------|------------------------------|---------|
| Repair template sequence                                     | GAACAATCAGTATAGAACATAAAAGTGGCGACGAGGACGAGATCGCAGGAGGAAGTGATATCCGATGAGCATGGGAAGTGGCGACGAGTTAAACAGTGTTTTACGCGTG                                                                                                                                                                                                                                                                                                                                                                        |                              |         |
| Repair template annotation                                   | Positions on CFAV-EVE1 + flanking regions sequence                                                                                                                                                                                                                                                                                                                                                                                                                                   | Positions on repair template |         |
| Upstream flanking HA                                         | 294-329                                                                                                                                                                                                                                                                                                                                                                                                                                                                              | Jan-36                       |         |
| CFAV-EVE1 NS5 modified                                       | 330-344                                                                                                                                                                                                                                                                                                                                                                                                                                                                              | 37-51                        |         |
| Exogenous sequence                                           | -                                                                                                                                                                                                                                                                                                                                                                                                                                                                                    | 52-75                        |         |
| CFAV-EVE1 NS5                                                | 1060                                                                                                                                                                                                                                                                                                                                                                                                                                                                                 | 76                           |         |
| Downstream flanking HA                                       | 1061-1094                                                                                                                                                                                                                                                                                                                                                                                                                                                                            | 77-110                       |         |
| Guide sequences                                              |                                                                                                                                                                                                                                                                                                                                                                                                                                                                                      |                              |         |
| Name                                                         | Guide sequence                                                                                                                                                                                                                                                                                                                                                                                                                                                                       | PAM                          | Strand  |
| EVE-SGup2                                                    | GGATGGGATCCCAGAAGCAC                                                                                                                                                                                                                                                                                                                                                                                                                                                                 | TGG                          | forward |
| EVE-SGdwn1                                                   | AAGTATTCCTGACTTAAAAG                                                                                                                                                                                                                                                                                                                                                                                                                                                                 | TGG                          | forward |
| EVE-SGmid1                                                   | CGCTGGGGGAATCTGGGCGG                                                                                                                                                                                                                                                                                                                                                                                                                                                                 | CGG                          | forward |
| Potential off-target sites                                   |                                                                                                                                                                                                                                                                                                                                                                                                                                                                                      |                              |         |
| EVE-SGup2                                                    | intergenic:AAEL008775-AAEL008778; intron:AAEL012020; intergenic:AAEL005724-AAEL005714; intergenic:Gap-AAEL014660                                                                                                                                                                                                                                                                                                                                                                     |                              |         |
| EVE-SGdwn1                                                   | intergenic:AAEL008346-AAEL008344; intron:AAEL012182; intergenic:Gap-AAEL014360; intergenic:Gap-AAEL014457                                                                                                                                                                                                                                                                                                                                                                            |                              |         |
| EVE-SGmid1                                                   | intron:AAEL003969; intergenic:AAEL003905-mir-999; exon:AAEL010467; intron:AAEL014570                                                                                                                                                                                                                                                                                                                                                                                                 |                              |         |
| Deletion result: flanking regions without CFAV-EVE1 sequence | AACTACCAGAAACGGTTGTAATGGACAACGAAAAATCATTTTTATCCGGTGAAGTTGTTAACTTTTTCAATGAAAACAAAATAACTCCTTATGTAGTAGCTACAGGTCGAAGCGAGATGAACTGTGATATATGT<br>CACAATCAGATTATATTATATACATGTAGTAGTGATAAGCAGAGAATAAAATAAACACAGCGAGCTGGGCTCGCTCTCTTTTTATCGTCGACTTTCGACCAAACAACACCTATTTTGTGACCTTCAATCCGAG<br>AAACTAATAGCAGTAAACCTAAAAAGAACAATCAGTATAGAACATAAAAGTGGCGACGAGTTAAACAGTGTTTAAACGCGTGCAAAAGTTCATGTGAAAATCTAAGTGAATTTGTCTTTTGTGTCATCTTCCTGTG<br>GAGTTTAATCACCGTTTAATTTCAATCTACTCGCAGCAGCATTGGCCATTGCA |                              |         |

**Table S3. CRISPR/Cas9 design for CFAV-EVE1 knockout. Related to Figure 3.**

|                            | Head tissues |          |           |           |          |          | Ovary tissues |          |            |           |          |            |
|----------------------------|--------------|----------|-----------|-----------|----------|----------|---------------|----------|------------|-----------|----------|------------|
|                            | Day 4        |          |           | Day 7     |          |          | Day 4         |          |            | Day 7     |          |            |
|                            | <i>Df</i>    | <i>F</i> | <i>p</i>  | <i>Df</i> | <i>F</i> | <i>p</i> | <i>Df</i>     | <i>F</i> | <i>p</i>   | <i>Df</i> | <i>F</i> | <i>p</i>   |
| Experiment                 | 4            | 5.47     | 0.0009*** | 2         | 1.17     | 0.3214   | 4             | 16.14    | <0.0001*** | 2         | 9.88     | 0.0004***  |
| Mosquito line              | 1            | 0.10     | 0.7585    | 1         | 10.43    | 0.0028** | 1             | 4.53     | 0.0375*    | 1         | 40.09    | <0.0001*** |
| Experiment × Mosquito line | 1            | 3.18     | 0.0204*   | -         | -        | -        | -             | -        | -          | -         | -        | -          |

**Table S4. Analysis of variance of CFAV RNA levels in tissues of CFAV-infected CFAV-EVE1 (+/+) and (-/-) *Aedes aegypti* mosquito lines. Related to Figure 5.**

| Library, SRA sample     | Description                                                                                                         | Total number of reads | Total number of reads mapped to CFAV | Number of reads mapped to CFAV, per 1 million reads |
|-------------------------|---------------------------------------------------------------------------------------------------------------------|-----------------------|--------------------------------------|-----------------------------------------------------|
| HGW27BGXX, SAMN13244317 | Outbred Thai <i>Aedes aegypti</i> with CFAV-EVE1 (+/?) and CFAV-EVE2 (+/?), full body, naturally infected with CFAV | 26244750              | 48779                                | 1858.62                                             |
| HG7CHBGXX, SAMN13244318 | Outbred Thai <i>Aedes aegypti</i> with CFAV-EVE1 (+/?) and CFAV-EVE2 (+/?), full body, uninfected with CFAV         | 23582504              | 181                                  | 7.68                                                |
| HVV5HBGXX, SAMN13244306 | Thai <i>Aedes aegypti</i> isofemale line with CFAV-EVE1 (+/?), full body, CFAV IT injected, replicate 1             | 56026424              | 47262                                | 847.57                                              |
| HVV5HBGXX, SAMN13244307 | Thai <i>Aedes aegypti</i> isofemale line with CFAV-EVE1 (+/?), full body, CFAV IT injected, replicate 2             | 52726002              | 50953                                | 966.37                                              |
| HVV5HBGXX, SAMN13244308 | Thai <i>Aedes aegypti</i> isofemale line with CFAV-EVE1 (+/?), full body, CFAV IT injected, replicate 3             | 38976406              | 35066                                | 899.67                                              |
| HVV5HBGXX, SAMN13244303 | Thai <i>Aedes aegypti</i> isofemale line with CFAV-EVE1 (+/?), full body, mock IT injected, replicate 1             | 68793501              | 450                                  | 6.54                                                |
| HVV5HBGXX, SAMN13244304 | Thai <i>Aedes aegypti</i> isofemale line with CFAV-EVE1 (+/?), full body, mock IT injected, replicate 2             | 33360151              | 339                                  | 10.16                                               |
| HVV5HBGXX, SAMN13244305 | Thai <i>Aedes aegypti</i> isofemale line with CFAV-EVE1 (+/?), full body, mock IT injected, replicate 3             | 95704497              | 504                                  | 5.27                                                |
| HJ5CNBGX9, SAMN13244315 | Isofemale line derived knockout line with CFAV-EVE1 (-/-), head, CFAV IT injected                                   | 18782124              | 15639                                | 832.65                                              |
| HJ5CNBGX9, SAMN13244313 | Isofemale line derived knockout sister line with CFAV-EVE1 (+/+), head, CFAV IT injected                            | 58304158              | 67711                                | 1161.34                                             |
| HJ5CNBGX9, SAMN13244316 | Isofemale line derived knockout line with CFAV-EVE1 (-/-), ovary, CFAV IT injected                                  | 30427824              | 198                                  | 6.51                                                |
| HJ5CNBGX9, SAMN13244314 | Isofemale line derived knockout sister line with CFAV-EVE1 (+/+), ovary, CFAV IT injected                           | 48147503              | 1327                                 | 27.56                                               |
| HJ5CNBGX9, SAMN13244311 | Isofemale line derived knockout line with CFAV-EVE1 (-/-), head, mock IT injected                                   | 46755526              | 32                                   | 0.68                                                |
| HJ5CNBGX9, SAMN13244309 | Isofemale line derived knockout sister line with CFAV-EVE1 (+/+), head, mock IT injected                            | 20106002              | 150                                  | 7.46                                                |
| HJ5CNBGX9, SAMN13244312 | Isofemale line derived knockout line with CFAV-EVE1 (-/-), ovary, mock IT injected                                  | 45050253              | 10                                   | 0.22                                                |
| HJ5CNBGX9, SAMN13244310 | Isofemale line derived knockout sister line with CFAV-EVE1 (+/+), ovary, mock IT injected                           | 28606142              | 522                                  | 18.25                                               |

**Table S5. sRNA library information. Related to Figure 1, 2 and 4.**
