# Supplementary material for: Non-retroviral Endogenous Viral Element Limits Cognate Virus Replication in Aedes aegypti Ovaries
Source: PubMed Central journal article supplement (PMC7522710; doi:10.1016/j.cub.2020.06.057), 2020-09-21

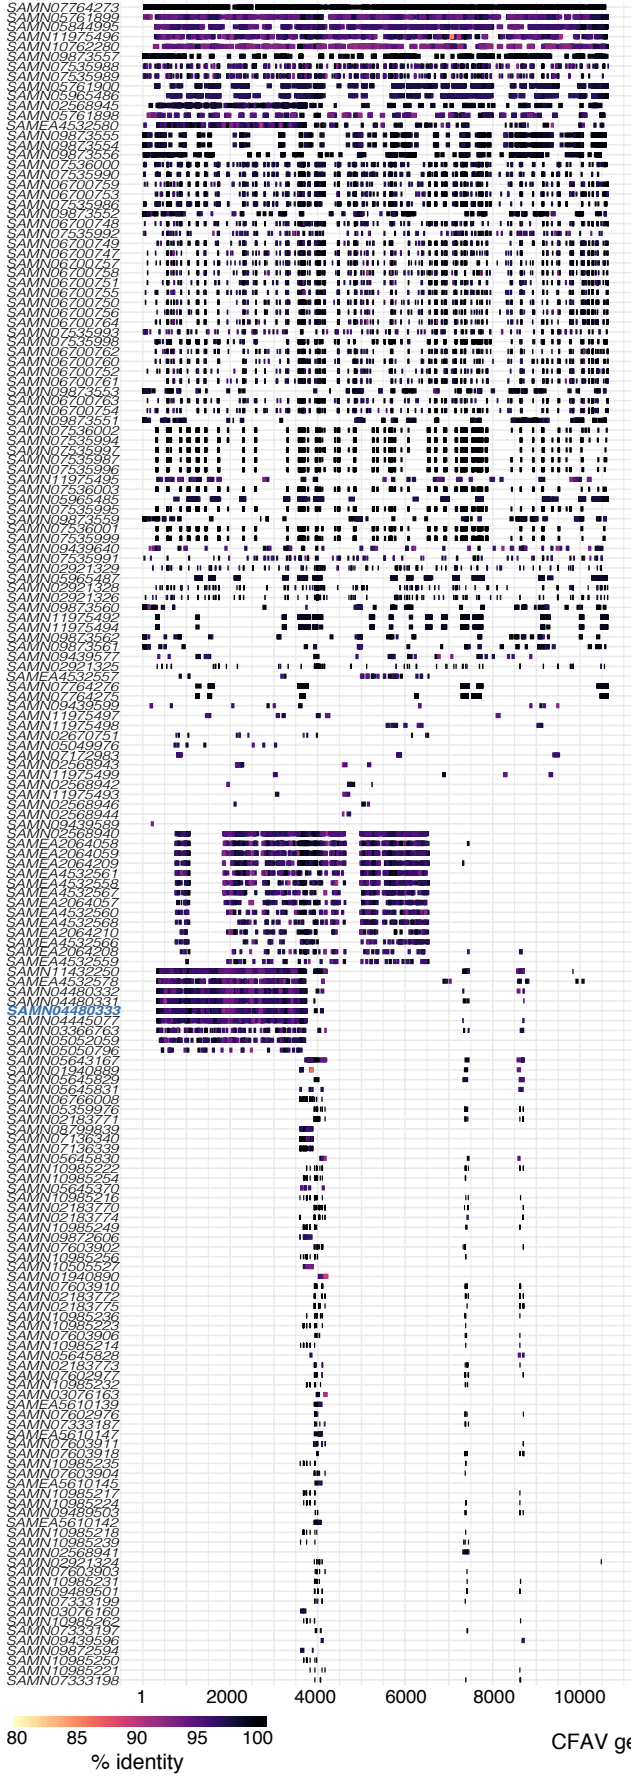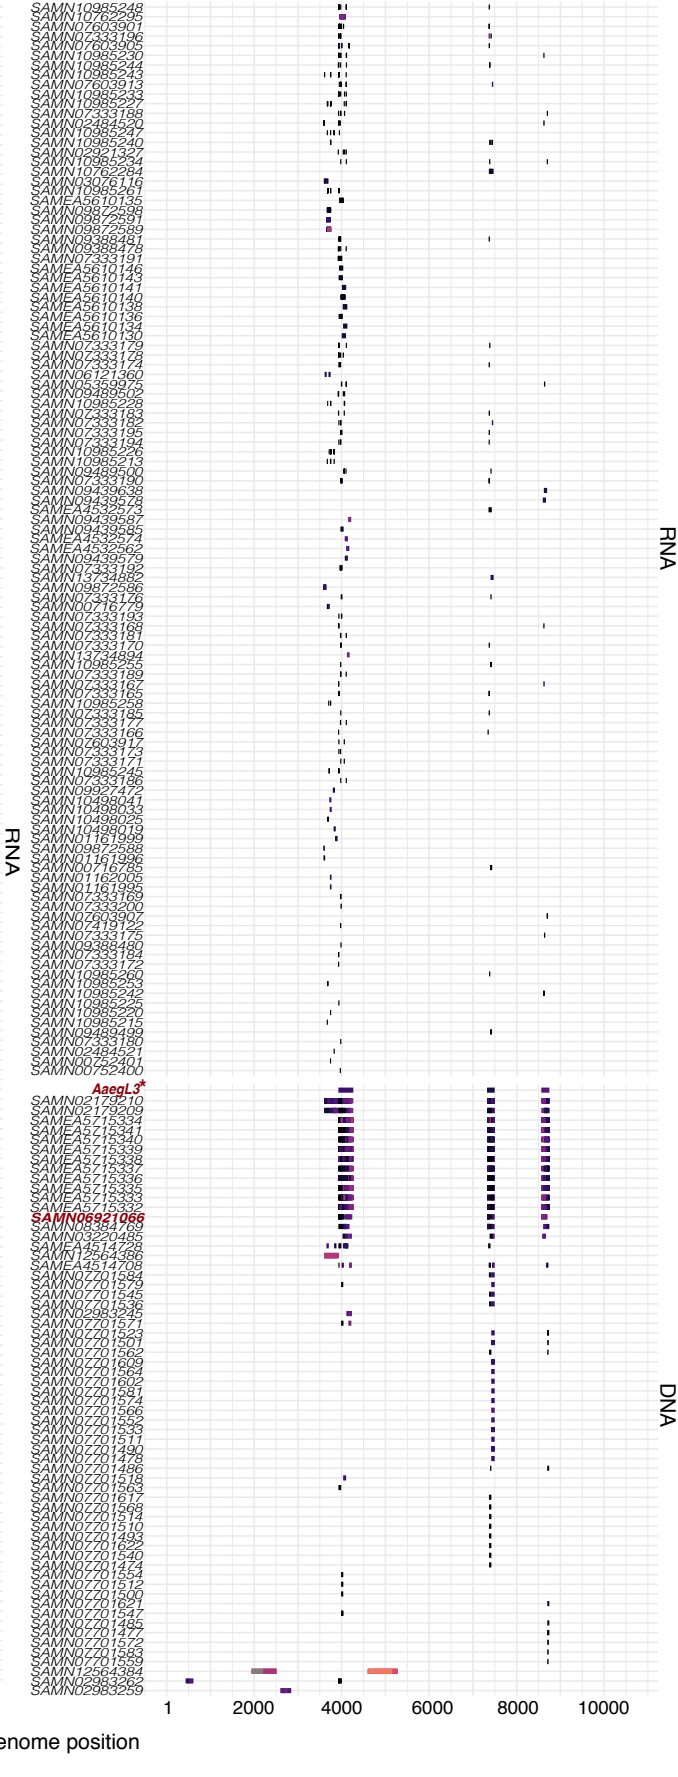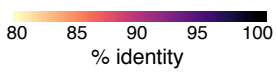

CFV genome position

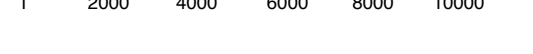

Supplement: mmc2.pdf [file mmc2.pdf]
